# Supplementary material
Source: PubMed Central journal article supplement (PMC3893852)
Supplement: imm0141-0079-SD3.pdf [file imm0141-0079-SD3.pdf]

**Supplementary Table 3.** Effect of *Mef2c*-deficiency on the expression of the genes in cluster 37 in the spleen.

| Cluster 37 genes           | <i>Mef2c</i> <sup>-/-</sup><br>mean gene<br>expression<br>level (log <sub>2</sub> ) <sup>a</sup> | Wild-type<br>mean gene<br>expression<br>level (log <sub>2</sub> ) | Fold change<br>( <i>Mef2c</i> <sup>-/-</sup><br>/WT) <sup>b</sup> | Effect of <i>Mef2c</i> -<br>deficiency on<br>gene<br>expression <sup>c</sup> |
|----------------------------|--------------------------------------------------------------------------------------------------|-------------------------------------------------------------------|-------------------------------------------------------------------|------------------------------------------------------------------------------|
| <i>Abca1</i>               |                                                                                                  |                                                                   |                                                                   | n/a                                                                          |
| AY512938                   |                                                                                                  |                                                                   |                                                                   | n/a                                                                          |
| <b>Ccr6</b>                | 12.1                                                                                             | 14.0                                                              | -3.6                                                              | down-regulated                                                               |
| <b>Cd200</b>               | 11.1                                                                                             | 12.2                                                              | -2.1                                                              | down-regulated                                                               |
| <i>Chst10</i>              |                                                                                                  |                                                                   |                                                                   | n/a                                                                          |
| <i>Daf2</i>                | n/a                                                                                              | n/a                                                               |                                                                   | n/a                                                                          |
| <b>Dclk2</b>               | 9.4                                                                                              | 11.4                                                              | -3.8                                                              | down-regulated                                                               |
| <b>Dexi</b>                | 12.5                                                                                             | 13.9                                                              | -2.7                                                              | down-regulated                                                               |
| <b>Erp27</b>               | 1.7                                                                                              | 2.9                                                               | -2.4                                                              | down-regulated                                                               |
| <i>Fam69a</i>              | 10.7                                                                                             | 11.2                                                              | -1.32                                                             | unchanged                                                                    |
| <b>Fcer2a</b>              | 11.6                                                                                             | 16.0                                                              | -22.2                                                             | down-regulated                                                               |
| <i>Fchsd2</i>              | 12.2                                                                                             | 12.9                                                              | -1.6                                                              | unchanged                                                                    |
| <b>Gdf11</b>               | 5.5                                                                                              | 6.7                                                               | -2.3                                                              | down-regulated                                                               |
| <i>Gm10759</i>             |                                                                                                  |                                                                   |                                                                   | n/a                                                                          |
| <i>Gm608</i>               |                                                                                                  |                                                                   |                                                                   | n/a                                                                          |
| <i>Gpr137c</i>             | 6.8                                                                                              | 7.7                                                               | -1.9                                                              | unchanged                                                                    |
| <i>Gpr174</i>              |                                                                                                  |                                                                   |                                                                   | n/a                                                                          |
| <b>Grap2</b>               | 11.2                                                                                             | 13.0                                                              | -3.5                                                              | down-regulated                                                               |
| <b>Gvin1</b>               | 11.8                                                                                             | 13.4                                                              | -3                                                                | down-regulated                                                               |
| <b>Icosl</b>               | 4.8                                                                                              | 8.4                                                               | -12.4                                                             | down-regulated                                                               |
| <i>Isg15</i>               |                                                                                                  |                                                                   |                                                                   | n/a                                                                          |
| <i>Lrrk2</i>               |                                                                                                  |                                                                   |                                                                   | n/a                                                                          |
| <i>Ms4a4c</i>              |                                                                                                  |                                                                   |                                                                   | n/a                                                                          |
| <b>Pxdc1/1300014I06Rik</b> | 12.8                                                                                             | 14.1                                                              | -2.5                                                              | down-regulated                                                               |
| <b>Slc4a3</b>              | 1.9                                                                                              | 4.1                                                               | -4.5                                                              | down-regulated                                                               |
| <i>Shank1</i>              |                                                                                                  |                                                                   |                                                                   | n/a                                                                          |
| <b>Neurl3</b>              | 11.1                                                                                             | 13.2                                                              | -4.3                                                              | down-regulated                                                               |
| <i>Rap1gds1</i>            | 4.1                                                                                              | 4.7                                                               | -1.6                                                              | unchanged                                                                    |
| <b>Rapgef4</b>             | 5.5                                                                                              | 10.4                                                              | -30.3                                                             | down-regulated                                                               |
| <i>Sh3bp2</i>              | 9.9                                                                                              | 10.6                                                              | -1.7                                                              | unchanged                                                                    |
| <b>Slc4a11</b>             | 4.9                                                                                              | 6.3                                                               | -2.7                                                              | down-regulated                                                               |
| <i>Stap1</i>               | 9.9                                                                                              | 9.9                                                               | -1.0                                                              | unchanged                                                                    |
| <i>Usp53</i>               |                                                                                                  |                                                                   |                                                                   | n/a                                                                          |
| <b>Ysk4</b>                | 4.0                                                                                              | 6.9                                                               | -7.6                                                              | down-regulated                                                               |
| <i>Zfp318</i>              | 8.6                                                                                              | 9.0                                                               | -1.4                                                              | unchanged                                                                    |

<sup>a</sup>, These data were performed on Agilent 4 x 44K whole-mouse genome expression arrays (Agilent Technologies, Inc., Santa Clara CA, USA) and equivalent gene probe sets were compared. Data source, GSE34210 [1].

<sup>b</sup>, Fold change in gene expression level in *Mef2c*<sup>-/-</sup> spleens when compared to wild-type controls.

<sup>c</sup>, gene symbols in bold type and described as “down-regulated”, fold change >2.0 when compared with wild-type controls. n/a, an equivalent annotated probe set was not present on the array.

1. Debnath I, Roundy KM, Pioli PD, Weiss JJ, Weiss JH. Bone marrow-induced *Mef2c* deficiency delays B-cell development and alters the expression of key B-cell regulatory proteins. *Int Immunol* 2013;25:99-115.
