# Supplementary material
Source: PubMed Central journal article supplement (PMC3893852)
Supplement: imm0141-0079-SD4.pdf [file imm0141-0079-SD4.pdf]

**Supplementary Table 4.** Comparison of the expression of the mouse GC B-cell related genes in cluster 20 by human GC B cells

| Cluster 20 genes <sup>a</sup> | Expression higher in human GC B cells when compared to the other populations <sup>b</sup> | <i>P</i> value (expression level in human GC B cells vs. other B-cell populations) |
|-------------------------------|-------------------------------------------------------------------------------------------|------------------------------------------------------------------------------------|
| <b>ADA</b>                    | 6.9                                                                                       | 8.8 x 10 <sup>-11</sup>                                                            |
| <b>AICDA</b>                  | 14.7                                                                                      | 0.0006                                                                             |
| <b>AMZ2</b>                   | 2.4                                                                                       | 3.4 x 10 <sup>-7</sup>                                                             |
| <i>ARHGAP8</i>                | not expressed                                                                             | -                                                                                  |
| <i>BASP1</i>                  | no                                                                                        | n.s.                                                                               |
| <b>BMPR1A</b>                 | 5.2                                                                                       | 2.5 x 10 <sup>-7</sup>                                                             |
| <i>C2CD2L</i>                 | not expressed                                                                             | -                                                                                  |
| <b>CCRL1</b>                  | 4.7                                                                                       | 0.006                                                                              |
| <i>CDK14</i>                  | no                                                                                        | n.s.                                                                               |
| <i>CNST</i>                   | no                                                                                        | n.s.                                                                               |
| <i>CORO2B</i>                 | not expressed                                                                             | -                                                                                  |
| <i>EAF2</i>                   | no                                                                                        | n.s.                                                                               |
| <i>EFNB1</i>                  | not expressed                                                                             | -                                                                                  |
| <i>EIF5A2</i>                 | not expressed                                                                             | -                                                                                  |
| <i>ERP44</i>                  | no                                                                                        | n.s.                                                                               |
| <i>FAS</i>                    | no                                                                                        | n.s.                                                                               |
| <i>FGF11</i>                  | no                                                                                        | n.s.                                                                               |
| <b>GCET2</b>                  | 11.5                                                                                      | 3.9 x 10 <sup>-6</sup>                                                             |
| <i>GCNT3</i>                  | not expressed                                                                             | -                                                                                  |
| <b>GNAZ</b>                   | 3.7                                                                                       | 7.6 x 10 <sup>-5</sup>                                                             |
| <b>H1FX</b>                   | 5.0                                                                                       | 0.0001                                                                             |
| <i>HAVCR1</i>                 | not expressed                                                                             | -                                                                                  |
| <i>HELQ</i>                   | no                                                                                        | n.s.                                                                               |
| <i>HPSE</i>                   | not expressed                                                                             | -                                                                                  |
| <i>DIDO1</i>                  | no                                                                                        | n.s.                                                                               |
| <i>ILDR1</i>                  | not expressed                                                                             | -                                                                                  |
| <i>LPIN2</i>                  | no                                                                                        | n.s.                                                                               |
| <i>MAPRE2</i>                 | no                                                                                        | n.s.                                                                               |
| <i>MBD2</i>                   | no                                                                                        | n.s.                                                                               |
| <i>MBD4</i>                   | no                                                                                        | n.s.                                                                               |
| <i>MTMR14</i>                 | no                                                                                        | n.s.                                                                               |
| <b>MYBL1</b>                  | 21.0                                                                                      | 0.0003                                                                             |
| <b>NEIL1</b>                  | 2.2                                                                                       | 3 x 10 <sup>-6</sup>                                                               |
| <i>OPTN</i>                   | no                                                                                        | n.s.                                                                               |
| <i>PARM1</i>                  | no                                                                                        | n.s.                                                                               |
| <i>PCYT1B</i>                 | no                                                                                        | n.s.                                                                               |
| <i>PDZD2</i>                  | no                                                                                        | n.s.                                                                               |
| <b>PHF19</b>                  | 7.1                                                                                       | 3 x 10 <sup>-10</sup>                                                              |
| <b>PLXNB2</b>                 | 2.8                                                                                       | 0.009                                                                              |
| <b>PPAP2A</b>                 | 3.1                                                                                       | 0.0002                                                                             |

|                |     |                        |
|----------------|-----|------------------------|
| <b>PPP4R2</b>  | 2.5 | 3.7 x 10 <sup>-5</sup> |
| <b>RASSF6</b>  | 3.5 | 0.0002                 |
| <b>RGS13</b>   | 5.4 | 8.1 x 10 <sup>-6</sup> |
| <i>RGS9</i>    | no  | n.s.                   |
| <b>RNF121</b>  | 2.6 | 0.0005                 |
| <b>S1PR2</b>   | 7.6 | 7 x 10 <sup>-10</sup>  |
| <b>SLC41A2</b> | 7.3 | 0.0004                 |
| <b>STAU2</b>   | 7.3 | 3 x 10 <sup>-8</sup>   |
| <i>TNFSF9</i>  | no  | n.s.                   |
| <b>UPRT</b>    | 2.5 | 0.0003                 |
| <i>VWA3B</i>   | no  | n.s.                   |

---

<sup>a</sup>, Equivalent probe set on the Affymetrix human genome U133A Plus 2.0 gene expression array was selected.

<sup>b</sup>, These data were performed on Affymetrix human genome U133A Plus 2.0 gene expression arrays and the expression of equivalent mouse gene probe sets were compared. Data sources: Ref. [1]; GSE12366, Ref. [2]; GSE15271, Ref. [3]. Fold change in mean gene expression level in human GC B cells when compared to naïve, memory and plasma B cells. Cluster 20 genes were identified with expression significantly > 2.0 X ( $P < 0.05$ ) in human GC B cells when compared to B cells, naïve and memory B cells.

Gene symbols in bold type indicate those significantly higher > 2.0 X in human GC cells. “no”, gene expressed by human GC B cells but at levels which were not significantly different to those in other B-cell populations. n.s., not significant.

1. Lyons PA, Koukoulaki M, Hatton A, Doggett K, Woffendin HB, Chaudhry AN, Smith KGC. Microarray analysis of human leucocyte subsets: the advantages of positive selection and rapid purification. *BMC Genomics* 2007; **8**:64.
2. Longo NS, Lugar PL, Yavuz S, *et al.* Analysis of somatic hypermutation in X-linked hyper-IgM syndrome shows specific deficiencies in mutational targeting. *Blood* 2009; **113**:3706-15.
3. Caron G, Le Gallou S, Lamy T, Tarte K, Fest T. CXCR4 expression functionally discriminates centroblasts versus centrocytes within human germinal center B cells. *J Immunol* 2009; **182**:7595-602.
