# Supplementary material
Source: PubMed Central journal article supplement (PMC3893852)
Supplement: imm0141-0079-SD5.pdf [file imm0141-0079-SD5.pdf]

**Supplementary Table 5.** Comparison of genes expressed highly in proposed human B1 B-cell by mouse B1 B cells

| Genes expressed >2.0 fold by proposed human B1 B cells when compared to naïve, memory and plasma B cells <sup>a</sup> | Fold change (proposed human B1 B cells vs. human naïve, memory and plasma B cells) <sup>b</sup> | Expression higher in mouse B1 B cells when compared to the other populations <sup>c</sup> | <i>P</i> value (expression level in mouse B1 B cells vs. other populations) | <i>P</i> value (expression level in mouse plasma cells vs. other populations) |
|-----------------------------------------------------------------------------------------------------------------------|-------------------------------------------------------------------------------------------------|-------------------------------------------------------------------------------------------|-----------------------------------------------------------------------------|-------------------------------------------------------------------------------|
| <i>ADAM23</i>                                                                                                         | 3.0                                                                                             | not expressed                                                                             | -                                                                           | not expressed                                                                 |
| <i>ANXA4</i>                                                                                                          | 2.2                                                                                             | no                                                                                        | n.s.                                                                        | 0.006                                                                         |
| <i>ARHGAP31</i>                                                                                                       | 2.1                                                                                             | no                                                                                        | n.s.                                                                        | 0.0004                                                                        |
| <i>BMP3</i>                                                                                                           | 3.3                                                                                             | no                                                                                        | n.s.                                                                        | n.s.                                                                          |
| <b><i>CCR1</i></b>                                                                                                    | 2.1                                                                                             | 2.8                                                                                       | 0.025.                                                                      | 0.0004                                                                        |
| <i>CD226</i>                                                                                                          | 2.4                                                                                             | not expressed                                                                             | -                                                                           | 0.0005                                                                        |
| <b><i>CD5</i></b>                                                                                                     | 2.5                                                                                             | 2.8                                                                                       | 2.9 x 10 <sup>-5</sup>                                                      | n.s.                                                                          |
| <i>CD96</i>                                                                                                           | 2.1                                                                                             | not expressed                                                                             | -                                                                           | n.s.                                                                          |
| <i>CHAD</i>                                                                                                           | 2.5                                                                                             | no                                                                                        | n.s.                                                                        | not expressed                                                                 |
| <i>DNAHC8</i>                                                                                                         | 2.4                                                                                             | no                                                                                        | n.s.                                                                        | n.s.                                                                          |
| <i>GSN</i>                                                                                                            | 2.3                                                                                             | no                                                                                        | n.s.                                                                        | 0.04                                                                          |
| <i>ITGAM</i>                                                                                                          | 2.1                                                                                             | no                                                                                        | n.s.                                                                        | 1 x 10 <sup>-7</sup>                                                          |
| <i>ITGAX</i>                                                                                                          | 2.9                                                                                             | not expressed                                                                             | -                                                                           | 0.006                                                                         |
| <i>PYHIN1</i>                                                                                                         | 2.0                                                                                             | no                                                                                        | n.s.                                                                        | 0.04                                                                          |
| <i>RASSF1</i>                                                                                                         | 2.1                                                                                             | no                                                                                        | n.s.                                                                        | not expressed                                                                 |
| <i>SLC16A10</i>                                                                                                       | 3.1                                                                                             | not expressed                                                                             | -                                                                           | n.s.                                                                          |
| <b><i>SYT11</i></b>                                                                                                   | 2.9                                                                                             | 2.0                                                                                       | 0.0009                                                                      | not expressed                                                                 |
| <i>TGM2</i>                                                                                                           | 2.5                                                                                             | no                                                                                        | n.s.                                                                        | 0.01                                                                          |
| <i>TNFRSF1B</i>                                                                                                       | 2.1                                                                                             | no                                                                                        | n.s.                                                                        | 1 x 10 <sup>-7</sup>                                                          |
| <i>TNFRSF21</i>                                                                                                       | 2.1                                                                                             | no                                                                                        | n.s.                                                                        | 6 x 10 <sup>-6</sup>                                                          |
| <i>UTS2D</i>                                                                                                          | 2.2                                                                                             | not expressed                                                                             | -                                                                           | not expressed                                                                 |
| <i>WASF1</i>                                                                                                          | 2.3                                                                                             | not expressed                                                                             | -                                                                           | not expressed                                                                 |

<sup>a</sup>, These data were performed on Affymetrix Human Gene 1.0 ST gene expression arrays and the expression of equivalent mouse gene probe sets were compared. Data source, GSE42724 [1]. Data were normalized and genes were identified which were expressed significantly > 2.0 X (*P* < 0.05) in human proposed B1 B cells when compared to naïve, memory and plasma B cells. Gene symbols in bold type indicate those significantly higher in mouse B1 cells.

<sup>b</sup>, Fold change in mean gene expression level in proposed human B1 B cells when compared to naïve, memory and plasma B cells.

<sup>c</sup>, Fold change significantly >2.0 (*P* < 0.05) in mouse B1 B cells when compared to all the other mouse B cell populations included in this study (Supplementary table 1). “no”, gene

expressed by mouse B1 B cells but at levels which were not significantly different to those in other B-cell populations. n.s., not significant.

1. Covens K, Verbinnen B, Geukens N, Meyts I, Schuit F, Van Lommel L, Jacquemin M, Bossuyt X. Characterization of proposed human B-1 cells reveals pre-plasmablast phenotype. Blood 2013;in press.
